# Supplementary material
Source: HighWire-hosted journal article supplement (https://bmjopen.bmj.com/content/11/3/e044239)
Supplement: inline-supplementary-material-1 [file inline-supplementary-material-1.pdf]

**Supplementary Table 1.** Key concepts and search terms

| Key concepts   | Search terms                                                                                                                                                              |
|----------------|---------------------------------------------------------------------------------------------------------------------------------------------------------------------------|
| cancer         | cancer OR neoplasm* OR tumour* OR tumor* OR malignan* OR carcinom* OR adenocarcinom* OR sarcom*                                                                           |
| colon          | colon* OR colorect* OR colo-rect* OR colorrect* OR intestin*                                                                                                              |
| lung           | bowel OR lung* OR pulmon* OR respirat* OR bronch*                                                                                                                         |
| survival       | survival OR surviving OR survive* OR mortalit* OR death* OR "hazard rate" OR "hazard ratio"                                                                               |
| Older patients | elder* OR "oldest old" OR "older patients" OR "older adults" OR "old age" OR aging OR ageing OR geriatr* OR geronto* OR octogenarian* OR septuagenarian* OR nonagenarian* |
