# Supplementary material
Source: HighWire-hosted journal article supplement (https://bmjopen.bmj.com/content/11/3/e044239)
Supplement: inline-supplementary-material-2 [file inline-supplementary-material-2.pdf]

**Supplementary Table 2.** Supplementary search strategy implemented in EMBASE

|    |                                                                                                                                                                                                                                  |
|----|----------------------------------------------------------------------------------------------------------------------------------------------------------------------------------------------------------------------------------|
| 1  | exp colon cancer/                                                                                                                                                                                                                |
| 2  | exp lung cancer/                                                                                                                                                                                                                 |
| 3  | ((colon* or colorect* or colo-rect* or colorrect* or intestin* or bowel or lung* or pulmon* or respirat* or bronch*) adj5 (cancer* or neoplas* or carcinom* or adenocarcinom* or sarcom* or malignan* or tumor* or tumour*)).tw. |
| 4  | 1 or 2 or 3                                                                                                                                                                                                                      |
| 5  | exp survival/                                                                                                                                                                                                                    |
| 6  | mortality/ or all cause mortality/ or cancer mortality/ or hospital mortality/ or exp mortality rate/ or standardized mortality ratio/ or surgical mortality/                                                                    |
| 7  | (survival or surviving or survive* or mortalit* or death* or "hazard rate*" or "hazard ratio*").tw.                                                                                                                              |
| 8  | 5 or 6 or 7                                                                                                                                                                                                                      |
| 9  | 4 and 8                                                                                                                                                                                                                          |
| 10 | (elder* or "oldest old" or "older adult*" or "old age" or "older patients" or aging or geriatr* or geronto* or octogenarian* or septuagenarian* or nonagenarian*).ti,ab.                                                         |
| 11 | 9 and 10                                                                                                                                                                                                                         |
| 12 | limit 11 to english                                                                                                                                                                                                              |
| 13 | limit 12 to (clinical trial or randomized controlled trial or controlled clinical trial or multicenter study or phase 1 clinical trial or phase 2 clinical trial or phase 3 clinical trial or phase 4 clinical trial)            |
| 14 | 12 not 13                                                                                                                                                                                                                        |
| 15 | limit 14 to (article or article in press or letter)                                                                                                                                                                              |
| 16 | "cancer registr*".tw.                                                                                                                                                                                                            |
| 17 | "population-based".tw.                                                                                                                                                                                                           |
| 18 | 17 or 16                                                                                                                                                                                                                         |
| 19 | 15 and 18                                                                                                                                                                                                                        |
