# Supplementary material
Source: HighWire-hosted journal article supplement (https://bmjopen.bmj.com/content/11/3/e044239)
Supplement: inline-supplementary-material-3 [file inline-supplementary-material-3.pdf]

**Supplementary Table 3.** PICO criteria

| <b>Element</b>                              | <b>Inclusion Criteria</b>                                            | <b>Exclusion Criteria</b>                                                                                                                                                                                   |
|---------------------------------------------|----------------------------------------------------------------------|-------------------------------------------------------------------------------------------------------------------------------------------------------------------------------------------------------------|
| <i>Participant</i>                          | Adult patients with colon or lung cancer                             | Animal studies<br><br>Papers focused only on patients under the age of 65                                                                                                                                   |
| <i>Intervention or exposure of interest</i> | Older age<br><br>Increasing age                                      |                                                                                                                                                                                                             |
| <i>Comparator</i>                           | Middle-aged or younger-aged                                          | Papers that do not compare survival by age group, or did not investigate the impact of increasing age on survival                                                                                           |
| <i>Outcome</i>                              | Survival or mortality risk                                           |                                                                                                                                                                                                             |
| <i>Study design</i>                         | Population-based                                                     | Clinical studies and clinical trials because of the strict inclusion criteria and underrepresentation of older adults in trials.<br><br>Studies where no association between age and survival are reported. |
| <i>Article type</i>                         | Original articles or letters                                         | Conference abstracts and reviews                                                                                                                                                                            |
| <i>Language</i>                             | English                                                              |                                                                                                                                                                                                             |
| <i>Study period</i>                         | From the inception of each electronic databases to 18 September 2020 |                                                                                                                                                                                                             |
