# Supplementary material
Source: HighWire-hosted journal article supplement (https://bmjopen.bmj.com/content/11/3/e044239)
Supplement: inline-supplementary-material-4 [file inline-supplementary-material-4.pdf]

**Supplementary Table 4.** Excluded studies (order by year, cancer site, and author)

| Cancer site               | First author, date           | Title                                                                                                                                     | Reason for exclusion                              |
|---------------------------|------------------------------|-------------------------------------------------------------------------------------------------------------------------------------------|---------------------------------------------------|
| Both sites                | Gafa et al., 1991            | Survival of patients with cancer of the stomach, colon and rectum, lung and breast in ragusa, sicily                                      | No individual factor investigated                 |
| Colon/Colorectum          | Slattery et al., 1995        | The impact of family history of colon-cancer on survival after diagnosis with colon-cancer                                                | Wrong age categories                              |
| Colon/Colorectum          | Crocetti et al., 1996        | Colorectal cancer survival - Population-based rates in the province of Florence                                                           | No individual factor investigated                 |
| Lung                      | Damhuis et al., 1996         | Resection rates and postoperative mortality in 7,899 patients with lung cancer                                                            | No individual factor investigated                 |
| Colon/Colorectum          | Monnet et al., 1998          | Comparability of colorectal cancer survival data in three European population-based registries                                            | No stratification by age                          |
| Both sites                | Teppo et al., 1999           | Cancer patient survival - Patterns, comparisons, trends - A population- based Cancer Registry study in Finland                            | More complete information in Dickman et al., 1999 |
| Other cancer site         | Lu-Yao et al., 1999          | Effect of age and surgical approach on complications and short-term mortality after radical prostatectomy - A population-based study      | Wrong topic                                       |
| Lung                      | Kuo et al., 2000             | Non-small cell lung cancer in very young and very old patients                                                                            | No individual factor investigated                 |
| Both sites                | Bradley et al., 2001         | Disparities in cancer diagnosis and survival                                                                                              | No stratification by age                          |
| Colon/Colorectum          | Faivre-Finn et al., 2002     | Colon cancer in France: evidence for improvement in management and survival                                                               | No individual factor investigated                 |
| Lung                      | van Meerbeeck et al., 2002   | High postoperative risk after pneumonectomy in elderly patients with right-sided lung cancer                                              | Not population-based study                        |
| Colon/Colorectum          | Folprecht et al., 2004       | Efficacy of 5-fluorouracil-based chemotherapy in elderly patients with metastatic colorectal cancer: A pooled analysis of clinical trials | Not population-based study                        |
| Colon/Colorectum          | O'Connell et al., 2004       | Do young colon cancer patients have worse outcomes?                                                                                       | Wrong age categories                              |
| All cancer sites combined | Inghelmann et al., 2005      | National estimates of cancer patients survival in Italy: A model-based method                                                             | Wrong cancer sites                                |
| Both sites                | Janssen-Heijnen et al., 2005 | Prognostic impact of increasing age and co-morbidity in cancer patients: a population-based approach                                      | No individual factor investigated                 |

| Cancer site      | First author, date          | Title                                                                                                                                       | Reason for exclusion              |
|------------------|-----------------------------|---------------------------------------------------------------------------------------------------------------------------------------------|-----------------------------------|
| Colon/Colorectum | Iversen et al., 2005        | Age and colorectal cancer with focus on the elderly: Trends in relative survival and initial treatment from a Danish Population-Based Study | No individual factor investigated |
| Colon/Colorectum | Milburn Jessup et al., 2005 | Adjuvant chemotherapy for stage III colon cancer: Implications of race:ethnicity, age, and differentiation                                  | Not population-based study        |
| Colon/Colorectum | Mitry et al., 2005          | Improvement in colorectal cancer survival: A population-based study                                                                         | Wrong cancer sites                |
| Colon/Colorectum | Scheiden et al., 2005       | Colon cancer in Luxembourg: A national population-based data report, 1988-1998                                                              | No individual factor investigated |
| Both sites       | Vercelli et al., 2006       | Cancer survival in the elderly: effects of socio-economic factors and health care system features (ELDCARE project)                         | No individual factor investigated |
| Lung             | Strand et al., 2006         | Survival after resection for primary lung cancer: A population based study of 3211 resected patients                                        | No individual factor investigated |
| Both sites       | Gondos et al., 2007         | Cancer survival in Germany and the United States at the beginning of the 21st century: An up-to-date comparison by period analysis          | No individual factor investigated |
| Colon/Colorectum | Larsen et al., 2007         | Survival after colorectal cancer in patients with Crohn's disease: A nationwide population-based Danish follow-up study                     | No individual factor investigated |
| Lung             | Brokx et al., 2007          | Surgical treatment for octogenarians with lung cancer: Results from a population-based series of 124 patients                               | Wrong age categories              |
| Lung             | Finlayson et al., 2007      | Outcomes in Octogenarians Undergoing High-Risk Cancer Operation: A National Study                                                           | No individual factor investigated |
| Both sites       | Micheli et al., 2009        | The advantage of women in cancer survival: An analysis of EURO CARE-4 data                                                                  | Wrong age categories              |
| Lung             | Koumariou et al., 2009      | Non small cell lung cancer in the elderly: Clinico-pathologic, management and outcome characteristics in comparison to younger patients     | Not population-based study        |
| Both sites       | Merrill et al., 2010        | Conditional Survival Among Cancer Patients in the United States                                                                             | No stratification by age          |
| Colon/Colorectum | Dekker et al., 2011         | Importance of the first postoperative year in the prognosis of elderly colorectal cancer patients                                           | No individual factor investigated |

| Cancer site       | First author, date           | Title                                                                                                                                                              | Reason for exclusion                                                                     |
|-------------------|------------------------------|--------------------------------------------------------------------------------------------------------------------------------------------------------------------|------------------------------------------------------------------------------------------|
| Colon/Colorectum  | Phipps et al., 2011          | Prediagnostic Smoking History, Alcohol Consumption, and Colorectal Cancer Survival The Seattle Colon Cancer Family Registry                                        | Wrong age categories                                                                     |
| Lung              | Baunemann Ott et al., 2011   | Survival and treatment patterns in elderly patients with advanced non-small-cell lung cancer in Manitoba                                                           | No individual factor investigated                                                        |
| Both sites        | Syse et al., 2012            | Cancer incidence, prevalence and survival in an aging Norwegian population                                                                                         | No individual factor investigated                                                        |
| Colon/Colorectum  | Brenner et al., 2012         | Progress in colorectal cancer survival in Europe from the late 1980s to the early 21st century: The EURO CARE study                                                | No individual factor investigated                                                        |
| Lung              | Cuffe et al., 2012           | Adjuvant chemotherapy for non-small-cell lung cancer in the elderly: A population-based study in Ontario, Canada                                                   | No individual factor investigated                                                        |
| Lung              | Janssen-Heijnen et al., 2012 | Treatment and survival of patients with small-cell lung cancer: small steps forward, but not for patients > 80                                                     | Not enough information to see if potential effect of extent of disease on age difference |
| Lung              | Paripati et al., 2012        | Multimodality therapy improves survival in elderly patients with locally advanced non-small cell lung cancer-A retrospective analysis                              | Not population-based study                                                               |
| Other cancer site | Schildberg et al., 2012      | Differences in the treatment of young gastric cancer patients: Patients under 50 years have better 5-year survival than older patients                             | Wrong cancer sites                                                                       |
| Colon/Colorectum  | Abraham et al., 2013         | Adjuvant chemotherapy for stage III colon cancer in the oldest old: Results beyond clinical guidelines                                                             | Wrong age categories                                                                     |
| Colon/Colorectum  | Allemani et al., 2013        | Colorectal cancer survival in the USA and Europe: A CONCORD high-resolution study                                                                                  | No individual factor investigated                                                        |
| Colon/Colorectum  | Mitry et al., 2013           | Improvement in survival of metastatic colorectal cancer: Are the benefits of clinical trials reproduced in population-based studies?                               | No individual factor investigated                                                        |
| Colon/Colorectum  | van den Broek et al., 2013   | Time trends in chemotherapy (administration and costs) and relative survival in stage III colon cancer patients - a large population-based study from 1990 to 2008 | No stratification by age                                                                 |

| Cancer site      | First author, date            | Title                                                                                                                                                    | Reason for exclusion              |
|------------------|-------------------------------|----------------------------------------------------------------------------------------------------------------------------------------------------------|-----------------------------------|
| Colon/Colorectum | Van Gestel et al., 2013       | Influence of comorbidity and age on 1-, 2-, and 3-month postoperative mortality rates in gastrointestinal cancer patients                                | No individual factor investigated |
| Colon/Colorectum | Wallace et al., 2013          | Racial disparities in advanced-stage colorectal cancer survival                                                                                          | Wrong age categories              |
| Colon/Colorectum | Hamaker et al., 2014          | Improved survival for older patients undergoing surgery for colorectal cancer between 2008 and 2011                                                      | No individual factor investigated |
| Colon/Colorectum | Li et al., 2014               | Better long-term survival in young patients with non-metastatic colorectal cancer after surgery, an analysis of 69,835 patients in SEER database         | Wrong age categories              |
| Colon/Colorectum | McKay et al., 2014            | Does young age influence the prognosis of colorectal cancer: a population-based analysis                                                                 | No individual factor investigated |
| Colon/Colorectum | Ortiz-Ortiz et al., 2014      | Effects of Type of Health Insurance Coverage on Colorectal Cancer Survival in Puerto Rico: A Population-Based Study                                      | No stratification by age          |
| Colon/Colorectum | Sankaranarayanan et al., 2014 | A registry study of the association of patient's residence and age with colorectal cancer survival                                                       | No individual factor investigated |
| Colon/Colorectum | Slavicek et al., 2014         | Efficacy and safety of bevacizumab in elderly patients with metastatic colorectal cancer: Results from the Czech population-based registry               | No individual factor investigated |
| Lung             | Huang et al., 2014            | Factors associated with lung cancer patients refusing treatment and their survival: A national cohort study under a universal health insurance in Taiwan | No individual factor investigated |
| Colon/Colorectum | Booth et al., 2015            | Management and Outcome of Colorectal Cancer Liver Metastases in Elderly Patients: A Population-Based Study                                               | No individual factor investigated |
| Colon/Colorectum | Khan et al., 2015             | Surgical management of metastatic colon cancer: A population-based analysis                                                                              | No individual factor investigated |
| Colon/Colorectum | Kotake et al., 2015           | Tumour characteristics, treatment patterns and survival of patients aged                                                                                 | Not population-based study        |
| Colon/Colorectum | Parakh et al., 2015           | Patterns of care and outcomes for elderly patients with metastatic colorectal cancer in Australia                                                        | Not population-based study        |

| Cancer site       | First author, date            | Title                                                                                                                                                                 | Reason for exclusion              |
|-------------------|-------------------------------|-----------------------------------------------------------------------------------------------------------------------------------------------------------------------|-----------------------------------|
| Colon/Colorectum  | Wang et al., 2015             | Clinicopathological Features and Survival Outcomes of Colorectal Cancer in Young Versus Elderly A Population-Based Cohort Study of SEER 9 Registries Data (1988-2011) | Wrong age categories              |
| Colon/Colorectum  | Zhang et al., 2015            | Effects of Health Insurance on Tumor Stage, Treatment, and Survival in Large Cohorts of Patients with Breast and Colorectal Cancer                                    | No individual factor investigated |
| Lung              | Speicher et al., 2015         | Outcomes after treatment of 17 378 patients with locally advanced (T3N0-2) non-small-cell lung cancer                                                                 | No individual factor investigated |
| Other cancer site | Damhuis et al., 2015          | Treatment patterns and survival analysis in 9014 patients with malignant pleural mesothelioma from Belgium, the Netherlands and England                               | Wrong cancer sites                |
| Colon/Colorectum  | Jiang et al., 2016            | Effect of age on survival outcome in operated and non-operated patients with colon cancer: A population-based study                                                   | Wrong age categories              |
| Colon/Colorectum  | Maffei et al., 2016           | Clinical features of colorectal cancer patients in advanced age: a population-based approach                                                                          | No individual factor investigated |
| Colon/Colorectum  | Yeo et al., 2016              | Surgical oncology outcomes in the aging US population                                                                                                                 | Not population-based study        |
| Both sites        | Chen et al., 2017             | Cancer survival in Qidong between 1972 and 2011: A population-based analysis                                                                                          | No individual factor investigated |
| Both sites        | Kwak et al., 2017             | Disparities by Age, Sex, Tumor Stage, Diagnosis Path, and Area-level Socioeconomic Status in Survival Time for Major Cancers: Results from the Busan Cancer Registry  | No individual factor investigated |
| Colon/Colorectum  | Chou et al., 2017             | The impact of young age on the prognosis for colorectal cancer: A population-based study in Taiwan                                                                    | Wrong cancer sites                |
| Colon/Colorectum  | Flemming et al., 2017         | Association between the time to surgery and survival among patients with colon cancer: A population-based study                                                       | No individual factor investigated |
| Colon/Colorectum  | Merchant et al., 2017         | Management of stage III colon cancer in the elderly: Practice patterns and outcomes in the general population                                                         | No stratification by age          |
| Colon/Colorectum  | Schlesinger-Raab et al., 2017 | Age and Outcome in Gastrointestinal Cancers: A Population-Based Evaluation of Oesophageal, Gastric and Colorectal Cancer                                              | Wrong cancer sites                |

| Cancer site      | First author, date    | Title                                                                                                                                                                    | Reason for exclusion              |
|------------------|-----------------------|--------------------------------------------------------------------------------------------------------------------------------------------------------------------------|-----------------------------------|
| Colon/Colorectum | Wallace et al., 2017  | Racial Differences in Stage IV Colorectal Cancer Survival in Younger and Older Patients                                                                                  | Wrong age categories              |
| Colon/Colorectum | Wan Kim et al., 2017  | The impact of delayed commencement of adjuvant chemotherapy (eight or more weeks) on survival in stage II and III colon cancer: a national population-based cohort study | No individual factor investigated |
| Colon/Colorectum | Wu et al., 2017       | Survival outcomes and surgical intervention of small intestinal neuroendocrine tumors: A population based retrospective study                                            | Wrong age categories              |
| Colon/Colorectum | Zhuang et al., 2017   | Age-related disparity in patients with colorectal cancer: A population-based study from SEER program                                                                     | No individual factor investigated |
| Both sites       | Li et al., 2018       | Has cancer survival improved for older people as for younger people? New South Wales, 1980-2012                                                                          | No individual factor investigated |
| Colon/Colorectum | Babaei et al., 2018   | Administration of adjuvant chemotherapy for stage II-III colon cancer patients: An European population-based study                                                       | No individual factor investigated |
| Colon/Colorectum | Breugom et al., 2018  | Decrease in 30-day and one-year mortality over time in patients aged $\geq 75$ years with stage I-III colon cancer: A population-based study                             | No individual factor investigated |
| Lung             | Dalwadi et al., 2018  | Practice Patterns and Outcomes in Elderly Stage I Non-Small-cell Lung Cancer: A 2004 to 2012 SEER Analysis                                                               | No individual factor investigated |
| Lung             | Damhuis et al., 2018  | Usage of Prophylactic Cranial Irradiation in Elderly Patients With Small-cell Lung Cancer                                                                                | No individual factor investigated |
| Lung             | Damhuis et al., 2018  | Population-based Results of Chemoradiotherapy for Limited Stage Small Cell Lung Cancer in The Netherlands                                                                | No individual factor investigated |
| Both sites       | Alawadhi Eet al.,2019 | Cancer survival trends in Kuwait, 2000-2013: A population-based study.                                                                                                   | No response from authors          |
| Both sites       | Alawadhi et al.,2019  | Cancer survival by stage at diagnosis in Kuwait: A population-based study                                                                                                | No stratification by age          |
| Both sites       | Arnold M. et al.,2019 | Progress in cancer survival, mortality, and incidence in seven high-income countries 1995-2014 (ICBP SURVMARK-2): a population-based study                               | No individual factor investigated |

| Cancer site      | First author, date     | Title                                                                                                                                                                               | Reason for exclusion              |
|------------------|------------------------|-------------------------------------------------------------------------------------------------------------------------------------------------------------------------------------|-----------------------------------|
| Both sites       | Baglia et al.,2019     | Diabetes Medication Use in Association with Survival among Patients of Breast, Colorectal, Lung, or Gastric Cancer                                                                  | No individual factor investigated |
| Both sites       | Cui et al.,2019        | Use of Antihypertensive Medications and Survival Rates for Breast, Colorectal, Lung, or Stomach Cancer                                                                              | No stratification by age          |
| Both sites       | Jang et al., 2019      | Socioeconomic status and survival outcomes in elderly cancer patients: A national health insurance service-elderly sample cohort study                                              | Wrong cancer sites                |
| Both sites       | Morishima et al.,2019  | Impact of comorbidities on survival in gastric, colorectal, and lung cancer patients                                                                                                | No stratification by age          |
| Colon/Colorectum | Adam et al.,2019       | The association of cancer-related fatigue with all-cause mortality of colorectal and endometrial cancer survivors: Results from the population-based PROFILES registry              | Wrong population                  |
| Colon/Colorectum | Ahl et al.,2019        | Effect of beta-blocker therapy on early mortality after emergency colonic cancer surgery                                                                                            | No stratification by age          |
| Colon/Colorectum | Alshareef et al.,2019  | Association between race and cancer-related mortality among patients with colorectal cancer in the united states: A retrospective cohort study                                      | No stratification by age          |
| Colon/Colorectum | Andersen et al.,2019   | Association of Race and Socioeconomic Status With Colorectal Cancer Screening, Colorectal Cancer Risk, and Mortality in Southern US Adults                                          | No stratification by age          |
| Colon/Colorectum | Arkenbosch et al.,2019 | The association between body mass index and postoperative complications, 30-day mortality and long-term survival in Dutch patients with colorectal cancer                           | No stratification by age          |
| Colon/Colorectum | Amarson et al.,2019    | Postoperative complications following colonic resection for cancer are associated with impaired long-term survival                                                                  | No stratification by age          |
| Colon/Colorectum | Behman et al.,2019     | Surgery for adhesive small-bowel obstruction is associated with improved long-term survival mediated through recurrence prevention: A population-based, propensity-matched analysis | Wrong cancer sites                |

| Cancer site      | First author, date         | Title                                                                                                                                                                                                 | Reason for exclusion              |
|------------------|----------------------------|-------------------------------------------------------------------------------------------------------------------------------------------------------------------------------------------------------|-----------------------------------|
| Colon/Colorectum | Benitez Majano et al.,2019 | Surgical treatment and survival from colorectal cancer in Denmark, England, Norway, and Sweden: a population-based study                                                                              | No stratification by age          |
| Colon/Colorectum | Bergvall et al.,2019       | Better survival for patients with colon cancer operated on by specialized colorectal surgeons - a nationwide population-based study in Sweden 2007-2010                                               | No stratification by age          |
| Colon/Colorectum | Bishnoiet al.,2019         | Dipeptidyl peptidase 4 inhibitors as novel agents in improving survival in diabetic patients with colorectal cancer and lung cancer: A Surveillance Epidemiology and Endpoint Research Medicare study | No individual factor investigated |
| Colon/Colorectum | Bogach et al.,2019         | 1-Age-related survival differences in patients with inflammatory bowel disease-associated colorectal cancer: A population- based cohort study                                                         | Wrong cancer sites                |
| Colon/Colorectum | Bos et al., 2019           | Postoperative mortality in elderly patients with colorectal cancer: The impact of age, time-trends and competing risks of dying                                                                       | No individual factor investigated |
| Colon/Colorectum | Brouwer et al., 2019       | The gap in postoperative outcome between older and younger patients with stage I-III colorectal cancer has been bridged                                                                               | No individual factor investigated |
| Colon/Colorectum | Callahan et al.,2019       | Low colorectal cancer survival in the Mountain West state of Nevada: A population-based analysis                                                                                                      | No stratification by age          |
| Colon/Colorectum | Carroll et al.,2019        | Trends in Colorectal Cancer Incidence and Survival in Iowa SEER Data: The Timing of It All                                                                                                            | Wrong age categories              |
| Colon/Colorectum | Cheung et al.,2019         | Epidemiology, characteristics, and survival of post-colonoscopy colorectal cancer in Asia: A population-based study                                                                                   | No stratification by age          |
| Colon/Colorectum | Degett et al.,2019         | Mortality after emergency treatment of colorectal cancer and associated risk factors, Åa nationwide cohort study                                                                                      | No stratification by age          |
| Colon/Colorectum | Drouillard et al.,2019     | Net survival in recurrence-free colon cancer patients                                                                                                                                                 | No individual factor investigated |
| Colon/Colorectum | Dulskas et al.,2019        | Metformin increases cancer specific survival in colorectal cancer patients-National cohort study                                                                                                      | No stratification by age          |
| Colon/Colorectum | Feng et al.,2019           | Increasing age-related survival gap among patients with colorectal cancer: a population-based retrospective study                                                                                     | Wrong cancer sites                |



| Cancer site      | First author, date    | Title                                                                                                                                                                | Reason for exclusion              |
|------------------|-----------------------|----------------------------------------------------------------------------------------------------------------------------------------------------------------------|-----------------------------------|
| Colon/Colorectum | Gan et al.,2019       | Impact of the Affordable Care Act on Colorectal Cancer Screening, Incidence, and Survival in Kentucky                                                                | No stratification by age          |
| Colon/Colorectum | Giesen et al.,2019    | Inter-hospital variation in resection rates of colon cancer in the Netherlands: A nationwide study                                                                   | No individual factor investigated |
| Colon/Colorectum | He et al.,2019        | A Comprehensive Study of the Effect on Colorectal Cancer Survival of Common Germline Genetic Variation Previously Linked with Cancer Prognosis                       | No stratification by age          |
| Colon/Colorectum | Heet al.,2019         | Effects of common genetic variants associated with colorectal cancer risk on survival outcomes after diagnosis: A large population-based cohort study                | No stratification by age          |
| Colon/Colorectum | Hines et al.,2019     | The association between post-treatment surveillance testing and survival in stage II and III colon cancer patients: An observational comparative effectiveness study | No stratification by age          |
| Colon/Colorectum | Joachim et al., 2019  | Overall survival of colorectal cancer by stage at diagnosis Data from the Martinique Cancer Registry                                                                 | Wrong cancer sites                |
| Colon/Colorectum | Kanemitsu et al.,2019 | Nomograms predicting survival and recurrence in colonic cancer in the era of complete mesocolic excision                                                             | Wrong topic                       |
| Colon/Colorectum | Kocian et al.,2019    | Is colorectal cancer a more aggressive disease in young patients? A population-based study from the Czech Republic                                                   | Wrong cancer sites                |
| Colon/Colorectum | Lang et al.,2019      | Extended Molecular Profiling Improves Stratification and Prediction of Survival After Resection of Colorectal Liver Metastases                                       | Wrong population                  |
| Colon/Colorectum | Lee et al.,2019       | Effect of length of time from diagnosis to treatment on colorectal cancer survival: A population-based study                                                         | No individual factor investigated |
| Colon/Colorectum | Li et al., 2019       | Effects of surgery on survival of elderly patients with stage I small-cell lung cancer: analysis of the SEER database                                                | Wrong age categories              |
| Colon/Colorectum | Lloyd et al.,2019     | Mental health disorders are more common in colorectal cancer survivors and associated with decreased overall survival                                                | Wrong population                  |

| Cancer site      | First author, date  | Title                                                                                                                                                                                                                                                             | Reason for exclusion     |
|------------------|---------------------|-------------------------------------------------------------------------------------------------------------------------------------------------------------------------------------------------------------------------------------------------------------------|--------------------------|
| Colon/Colorectum | Lycke et al.,2019   | Preadmission use of antidepressants and risk of complications and death after colorectal cancer surgery: a nationwide population-based cohort study                                                                                                               | Wrong cancer sites       |
| Colon/Colorectum | Mendis et al.,2019  | Right versus left sided metastatic colorectal cancer: Teasing out clinicopathologic drivers of disparity in survival                                                                                                                                              | No stratification by age |
| Colon/Colorectum | Negri et al.,2019   | Impact of laterality and mucinous histology on relapse-free and overall survival in a registry-based colon cancer series                                                                                                                                          | No stratification by age |
| Colon/Colorectum | Phimha et al.,2019  | Health Insurance and Colorectal Cancer Survival in Khon Kaen, Thailand.                                                                                                                                                                                           | No stratification by age |
| Colon/Colorectum | Pule et al.,2019    | The effects of comorbidity on colorectal cancer mortality in an Australian cancer population                                                                                                                                                                      | No stratification by age |
| Colon/Colorectum | Raouf et al.,2019   | Liver Resection Improves Survival in Colorectal Cancer Patients: Causal-effects From Population-level Instrumental Variable Analysis                                                                                                                              | No stratification by age |
| Colon/Colorectum | Shi et al.,2019     | Chemotherapy is associated with increased survival from colorectal signet ring cell carcinoma with distant metastasis: A Surveillance, Epidemiology, and End Results database analysis                                                                            | No stratification by age |
| Colon/Colorectum | Shulman et al.,2019 | Compliance with Cancer Quality Measures Over Time and Their Association with Survival Outcomes: The Commission on Cancer's Experience with the Quality Measure Requiring at Least 12 Regional Lymph Nodes to be Removed and Analyzed with Colon Cancer Resections | No stratification by age |
| Colon/Colorectum | Storli et al.,2019  | Impact of increased resection rates and a liver parenchyma sparing strategy on long-term survival after surgery for colorectal liver metastases. A population-based study                                                                                         | No stratification by age |
| Colon/Colorectum | Sun et al.,2019     | Impact of Insurance Status on Stage, Treatment, and Survival in Patients with Colorectal Cancer: A Population-Based Analysis                                                                                                                                      | Wrong cancer sites       |
| Colon/Colorectum | Syse et al.,2019    | Short-term survival after colorectal cancer in a screened versus unscreened population                                                                                                                                                                            | No stratification by age |

| Cancer site      | First author, date        | Title                                                                                                                                                                          | Reason for exclusion              |
|------------------|---------------------------|--------------------------------------------------------------------------------------------------------------------------------------------------------------------------------|-----------------------------------|
| Colon/Colorectum | Te Marveldeet et al.,2019 | Alignment with Indices of A Care Pathway Is Associated with Improved Survival: An Observational Population-based Study in Colon Cancer Patients.                               | No stratification by age          |
| Colon/Colorectum | Ulanja et al.,2019        | Colon Cancer Sidedness, Presentation, and Survival at Different Stages                                                                                                         | No stratification by age          |
| Colon/Colorectum | Vallance et al., 2019     | The impact of advancing age on incidence of hepatectomy and post-operative outcomes in patients with colorectal cancer liver metastases: a population-based cohort study       | Wrong cancer sites                |
| Colon/Colorectum | Van Abbema et al., 2019   | Trends in overall survival and treatment patterns in two large population-based cohorts of patients with breast and colorectal cancer                                          | No individual factor investigated |
| Colon/Colorectum | Wang et al.,2019          | Impact of Tumor Location and Variables Associated With Overall Survival in Patients With Colorectal Cancer: A Mayo Clinic Colon and Rectal Cancer Registry Study               | Not population-based study        |
| Colon/Colorectum | Wang et al.,2019          | Association between Primary Tumor Location and Prognostic Survival in Synchronous Colorectal Liver Metastases after Surgical Treatment: A Retrospective Analysis of SEER Data  | No individual factor investigated |
| Colon/Colorectum | Xu et al.,2019            | Treatments for Stage IV Colon Cancer and Overall Survival                                                                                                                      | Not population-based study        |
| Colon/Colorectum | Yu et al.,2019            | The long-term survival characteristics of a cohort of colorectal cancer patients and baseline variables associated with survival outcomes with or without time-varying effects | No stratification by age          |
| Colon/Colorectum | Zhou et al.,2019          | Prognostic nomograms for predicting cause-specific survival and overall survival of stage I-III colon cancer patients: a large population-based study                          | Wrong topic                       |
| Lung             | Arffman et al.,2019       | The impact of severe mental illness on lung cancer mortality of patients with lung cancer in Finland in 1990-2013: a register-based cohort study                               | No stratification by age          |
| lung             | Cao et al.,2019           | Clinicopathological characteristics, treatment and survival of pulmonary large cell neuroendocrine carcinoma: A SEER population-based study                                    | No individual factor investigated |

| Cancer site | First author, date      | Title                                                                                                                                                                     | Reason for exclusion              |
|-------------|-------------------------|---------------------------------------------------------------------------------------------------------------------------------------------------------------------------|-----------------------------------|
| Lung        | Christensen et al.,2019 | Treatment, no treatment and early death in Danish stage I lung cancer patients                                                                                            | No stratification by age          |
| Lung        | Dalwadi et al.,2019     | A matter of comprehensive informed consent: Short-term mortality rates with definitive treatment options in elderly stage I NSCLC                                         | No individual factor investigated |
| Lung        | Duggan et al.,2019      | Palliative care and psychosocial care in metastatic non-small cell lung cancer: factors affecting utilisation of services and impact on patient survival                  | No stratification by age          |
| Lung        | Gedvilaitė et al., 2019 | Lung Cancer Survival in Lithuania: Changes by Histology, Age, and Sex From 2003-2007 to 2008-2012                                                                         | No individual factor investigated |
| Lung        | Gibson et al.,2019      | Factors associated with early mortality in non-small cell lung cancer patients following systemic anti-cancer therapy: A 10 year population-based study                   | No stratification by age          |
| Lung        | He et al.,2019          | Prognostic nomogram predicts overall survival in pulmonary large cell neuroendocrine carcinoma                                                                            | Wrong topic                       |
| Lung        | Heilbroner et al.,2019  | Impact of estrogen monotherapy on survival in women with stage III-IV non-small cell lung cancer                                                                          | No stratification by age          |
| Lung        | Hong et al.,2019        | Increasing PET use in small cell lung cancer: Survival improvement and stage migration in the VA central cancer registry                                                  | No stratification by age          |
| Lung        | Klugman et al.,2019     | Race/ethnicity and lung cancer survival in the United States: a meta-analysis                                                                                             | Wrong design                      |
| Lung        | Lee et al.,2019         | Are heart doses associated with survival in patients with non-small cell lung cancer who received post-operative thoracic radiotherapy? A national population-based study | No stratification by age          |
| Lung        | Li et al.,2019          | Poor survival of non-small-cell lung cancer patients with main bronchus tumor: a large population-based study                                                             | No response from authors          |
| Lung        | Liao et al.,2019        | A nomogram for the prediction of overall survival in patients with stage II and III non-small cell lung cancer using a population-based study                             | Wrong topic                       |

| Cancer site | First author, date      | Title                                                                                                                                                      | Reason for exclusion              |
|-------------|-------------------------|------------------------------------------------------------------------------------------------------------------------------------------------------------|-----------------------------------|
| Lung        | Liu et al.,2019         | Cause-specific death assessment of patients with stage i small-cell lung cancer: A competing risk analysis                                                 | Wrong topic                       |
| Lung        | Lofling et al.,2019     | Clinical characteristics and survival in non-small cell lung cancer patients by smoking history: a population-based cohort study                           | No stratification by age          |
| Lung        | Moore et al.,2019       | Survival Implications of de Novo Versus Recurrent Metastatic Non-Small Cell Lung Cancer                                                                    | No response from authors          |
| Lung        | Nelson et al.,2019      | Persistent opioid use is associated with worse survival after lobectomy for stage i non-small cell lung cancer                                             | No stratification by age          |
| Lung        | Ostheimer et al.,2019   | Mortality after radiotherapy or surgery in the treatment of early stage non-small-cell lung cancer: a population-based study on recent developments        | No stratification by age          |
| Lung        | Radkiewicz et al.,2019  | Sex and survival in non-small cell lung cancer: A nationwide cohort study                                                                                  | No stratification by age          |
| Lung        | Schillemans et al.,2019 | Association between surgical volume and post-operative mortality and survival after surgical resection in lung cancer in Belgium: A population-based study | No stratification by age          |
| Lung        | Shah et al.,2019        | Survival associated with chronic obstructive pulmonary disease among SEER-medicare beneficiaries with non-small-cell lung cancer                           | No stratification by age          |
| Lung        | Shaoet al.,2019         | Chemotherapy treatments, costs of care, and survival for patients diagnosed with small cell lung cancer: A SEER-Medicare study                             | No stratification by age          |
| Lung        | Smeltzer et al.,2019    | Survival Before and After Direct Surgical Quality Feedback in a Population-Based Lung Cancer Cohort                                                        | No stratification by age          |
| Lung        | Solberg et al.,2019     | Increase in curative treatment and survival of lung cancer in Norway 2001-2016                                                                             | No stratification by age          |
| Lung        | Song et al.,2019        | Impact of the homogeneous and heterogeneous risk factors on the incidence and survival outcome of bone metastasis in NSCLC patients                        | No individual factor investigated |
| Lung        | Souza et al.,2019       | Lung cancer mortality trends in different urban settings in Brazil, 2000-2015                                                                              | No stratification by age          |

| Cancer site       | First author, date    | Title                                                                                                                                                      | Reason for exclusion          |
|-------------------|-----------------------|------------------------------------------------------------------------------------------------------------------------------------------------------------|-------------------------------|
| Lung              | Sun et al.,2019       | Effects of primary tumor resection on the survival of patients with stage IV extrathoracic metastatic non-small cell lung cancer: A population-based study | No stratification by age      |
| Lung              | Tran et al.,2019      | Reintervention and Survival After Limited Lung Resection for Lung Cancer Treatment in Australia                                                            | No stratification by age      |
| Lung              | Vyfhuis et al.,2019   | Patterns of Care and Survival in Stage III NSCLC Among Black and Latino Patients Compared With White Patients                                              | Not population-based study    |
| Lung              | Wang et al.,2019      | Survival nomogram for patients with initially diagnosed metastatic non-small-cell lung cancer: A SEER-based study                                          | Wrong topic                   |
| Lung              | Yan et al.,2019       | Stereotactic body radiation therapy with higher biologically effective dose is associated with improved survival in stage II non-small cell lung cancer    | Not population-based study    |
| Lung              | Zheng et al.,2019     | Nomograms to Predict Survival in Patients with Lung Squamous Cell Cancer: A Population-Based Study                                                         | Wrong topic                   |
| Other cancer site | Wang et al.,2019      | Metastatic pattern discriminates survival benefit of primary surgery for de novo stage IV breast cancer: A real-world observational study                  | Wrong cancer sites            |
|                   | Ahl et al.,2019       | The Relationship Between Severe Complications, Beta-Blocker Therapy and Long-Term Survival Following Emergency Surgery for Colon Cancer                    | No stratification by age      |
|                   | Hallowell et al.,2019 | Cancer mortality rates among US and foreign-born individuals: United States 2005-2014                                                                      | No survival or mortality data |
|                   | Merie et al.,2019     | Radiotherapy underutilisation and its impact on local control and survival in New South Wales, Australia                                                   | No survival or mortality data |
| Both sites        | Forjaz et al.,2020    | Measuring progress against cancer in the Azores, Portugal: Incidence, survival, and mortality trends and projections to 2025.                              | No stratification by age      |
| Both sites        | Grundmann et al.,2020 | Trends in cancer incidence and survival in the Augsburg study region-results from the Augsburg cancer registry                                             | No stratification by age      |
| Both sites        | Lam et al.,2020       | Medicaid Expansion and Mortality Among Patients With Breast, Lung, and Colorectal Cancer                                                                   | No stratification by age      |

| Cancer site      | First author, date           | Title                                                                                                                                                                               | Reason for exclusion              |
|------------------|------------------------------|-------------------------------------------------------------------------------------------------------------------------------------------------------------------------------------|-----------------------------------|
| Both sites       | Okawa et al.,2020            | Hospital volume and postoperative 5-year survival for five different cancer sites: A population-based study in Japan                                                                | No stratification by age          |
| Colon/Colorectum | Luque-Fernandez et al.,2020  | Socioeconomic Inequalities in Colorectal Cancer Survival in Southern Spain: A Multilevel Population-Based Cohort Study                                                              | Wrong cancer sites                |
| Colon/Colorectum | Aguiar Junior .et al.,2020   | Survival of patients with colorectal cancer in a cancer center                                                                                                                      | Not population-based study        |
| Colon/Colorectum | Akhtar-Danesh N. et al.,2020 | Uptake of minimally invasive surgery for early stage colorectal cancer and its effect on survival: A population-based study: MIS for Colorectal Cancer                              | No stratification by age          |
| Colon/Colorectum | Alabdalyet al.,2020          | Colorectal cancer in Nineveh: Five years survival rate                                                                                                                              | No individual factor investigated |
| Colon/Colorectum | Alwers et al.,2020           | Microsatellite instability and survival after adjuvant chemotherapy among stage II and III colon cancer patients: results from a population-based study                             | No stratification by age          |
| Colon/Colorectum | Azzam et al.,2020            | Predictors of Survival Among Colorectal Cancer Patients in a Low Incidence Area                                                                                                     | Not population-based study        |
| Colon/Colorectum | Bingmer et al.,2020          | Primary tumor location impacts survival in colorectal cancer patients after resection of liver metastases                                                                           | No individual factor investigated |
| Colon/Colorectum | Blackmore et al.,2020        | The characteristics and outcomes of patients with colorectal cancer in New Zealand, analysed by Cancer Network                                                                      | Wrong cancer sites                |
| Colon/Colorectum | Boakye et al.,2020           | Magnitude of the age-advancement effect of comorbidities in colorectal cancer prognosis                                                                                             | No stratification by age          |
| Colon/Colorectum | Bouteret al.,2020            | It's contrary, Comorbidity does not affect survival of South Africans with colorectal cancer: An analysis from the Colorectal Cancer in South Africa cohort                         | No stratification by age          |
| Colon/Colorectum | Breugomet al.,2020           | Treatment strategies and overall survival for incurable metastatic colorectal cancer - A EURECCA international comparison including 21,196 patients from the Netherlands and Norway | No individual factor investigated |
| Colon/Colorectum | Brown et al.,2020            | The Association of Abdominal Adiposity With Mortality in Patients With Stage I-III Colorectal Cancer                                                                                | No stratification by age          |

| Cancer site      | First author, date      | Title                                                                                                                                                               | Reason for exclusion              |
|------------------|-------------------------|---------------------------------------------------------------------------------------------------------------------------------------------------------------------|-----------------------------------|
| Colon/Colorectum | Cai et al.,2020         | Association of age and cause-special mortality in patients with stage I/II colon cancer: A population-based competing risk analysis                                 | No individual factor investigated |
| Colon/Colorectum | Chow et al.,2020        | Nonadherence to Standard of Care for Locally Advanced Colon Cancer as a Contributory Factor for High Mortality Rates in Kentucky                                    | No stratification by age          |
| Colon/Colorectum | Degett et al.,2020      | Nationwide cohort study of the impact of education, income and social isolation on survival after acute colorectal cancer surgery                                   | No individual factor investigated |
| Colon/Colorectum | Elshenawy et al.,2020   | Survival benefit of surgical resection after first-line triplet chemotherapy and bevacizumab in patients with initially unresectable metastatic colorectal cancer   | Not population-based study        |
| Colon/Colorectum | Enofe et al.,2020       | Receipt of Adjuvant Chemotherapy in Stage II Colon Cancer and Overall Survival: A National Cancer Database Study                                                    | No individual factor investigated |
| Colon/Colorectum | Feng et al.,2020        | Increasing age-related survival gap among patients with colorectal cancer: a population-based retrospective study                                                   | No individual factor investigated |
| Colon/Colorectum | Feng et al.,2020        | Marital status and survival of patients with colorectal signet ring cell carcinoma: a population-based study                                                        | No stratification by age          |
| Colon/Colorectum | Finke et al.,2020       | Educational inequalities and regional variation in colorectal cancer survival in Finland.                                                                           | No stratification by age          |
| Colon/Colorectum | Frankenfeld et al.,2020 | Racial disparities in colorectal cancer time-to-treatment and survival time in relation to diagnosing hospital cancer-related diagnostic and treatment capabilities | No stratification by age          |
| Colon/Colorectum | Freeman et al.,2020     | Spatial access to primary care providers and colorectal cancer-specific survival in Cook County, Illinois                                                           | No stratification by age          |
| Colon/Colorectum | Giorli et al.,2020      | Prediagnostic use of low-dose aspirin and risk of incident metastasis and all-cause mortality among patients with colorectal cancer                                 | No stratification by age          |
| Colon/Colorectum | Gleason et al.,2020     | Early Elective Surgery After Colon Cancer Diagnosis has Higher Risk of Readmission and Death.                                                                       | No individual factor investigated |



| Cancer site      | First author, date              | Title                                                                                                                                                                                     | Reason for exclusion              |
|------------------|---------------------------------|-------------------------------------------------------------------------------------------------------------------------------------------------------------------------------------------|-----------------------------------|
| Colon/Colorectum | Han et al.,2020                 | Nomogram to predict the risk and survival of synchronous bone metastasis in colorectal cancer: a population-based real-world analysis                                                     | Wrong topic                       |
| Colon/Colorectum | Hineset al.,2020                | Surveillance Colonoscopy in Older Stage i Colon Cancer Patients and the Association with Colon Cancer-Specific Mortality                                                                  | No stratification by age          |
| Colon/Colorectum | Huang et al.,2020               | Postdiagnostic metformin use and survival of patients with colorectal cancer: A Nationwide cohort study                                                                                   | No stratification by age          |
| Colon/Colorectum | Jansen et al.,2020              | Area-Based Socioeconomic Inequalities in Colorectal Cancer Survival in Germany: Investigation Based on Population-Based Clinical Cancer Registration                                      | Wrong cancer sites                |
| Colon/Colorectum | Kumari et al.,2020              | Resection of colorectal cancer liver metastases in older patients                                                                                                                         | Not population-based study        |
| Colon/Colorectum | Leonget al.,2020                | Survival rates and associated factors of colorectal cancer patients in Brunei Darussalam                                                                                                  | No individual factor investigated |
| Colon/Colorectum | Luque-Fernandez et al.,2020     | Multimorbidity and short-term overall mortality among colorectal cancer patients in Spain: A population-based cohort study                                                                | No stratification by age          |
| Colon/Colorectum | Macek et al.,2020               | Changes in survival of colorectal cancer patients in ≈öwifôtokrzyskie province (Southern Poland) from the second half of the 1990s to the early 21st century ,Äi a population-based study | No individual factor investigated |
| Colon/Colorectum | Micu et al.,2020                | Evaluation of prognostic factors for 5 year-survival after surgery for colorectal cancer                                                                                                  | No response from authors          |
| Colon/Colorectum | Niemel√sinen.et al.,2020        | Risk factors of short-term survival in the aged in elective colon cancer surgery: a population-based study                                                                                | Wrong age categories              |
| Colon/Colorectum | Niemelainen et al.,2020         | Long-term survival following elective colon cancer surgery in the aged. A population-based cohort study                                                                                   | Wrong age categories              |
| Colon/Colorectum | Noepel-Duennebacke et al., 2020 | High microsatellite instability (MSI-H) is associated with distinct clinical and molecular characteristics and an improved survival in early Colon cancer (CC)                            | Wrong design                      |
| Colon/Colorectum | Oh et al.,2020                  | Changes in Colorectal Cancer 5-Year Survival Disparities in California, 1997-2014                                                                                                         | No individual factor investigated |

| Cancer site      | First author, date   | Title                                                                                                                                                                                                                | Reason for exclusion              |
|------------------|----------------------|----------------------------------------------------------------------------------------------------------------------------------------------------------------------------------------------------------------------|-----------------------------------|
| Colon/Colorectum | Paszat et al.,2020   | Morbidity and mortality following major large bowel resection for colorectal cancer detected by a population-based screening program                                                                                 | Wrong cancer sites                |
| Colon/Colorectum | Pesola et al.,2020   | Family history of colorectal cancer and survival: a Swedish population-based study                                                                                                                                   | No stratification by age          |
| Colon/Colorectum | Qiang et al.,2020    | Impact of diabetes on colorectal cancer stage and mortality risk: a population-based cohort study                                                                                                                    | No stratification by age          |
| Colon/Colorectum | Rogers et al.,2020   | Rural, Åiurban disparities in colorectal cancer survival and risk among men in Utah: a statewide population-based study                                                                                              | No stratification by age          |
| Colon/Colorectum | Saraste et al.,2020  | Population-based analysis of outcomes with early-age colorectal cancer                                                                                                                                               | Wrong cancer sites                |
| Colon/Colorectum | Scherman et al.,2020 | Influence of primary tumour and patient factors on survival in patients undergoing curative resection and treatment for liver metastases from colorectal cancer                                                      | No individual factor investigated |
| Colon/Colorectum | Scherman et al.,2020 | Impact of patient, primary tumor and metastatic pattern including tumor location on survival in patients undergoing ablation or resection for colorectal liver metastases: A population-based national cohort study. | No individual factor investigated |
| Colon/Colorectum | Shirdel et al.,2020  | Body composition measured by computed tomography is associated with colorectal cancer survival, also in early-stage disease                                                                                          | No individual factor investigated |
| Colon/Colorectum | Sjostrom et al.,2020 | Travel time to care does not affect survival for patients with colorectal cancer in northern Sweden: A data linkage study from the Risk North database                                                               | No stratification by age          |
| Colon/Colorectum | Taylor et al.,2020   | Association Between Inflammatory Bowel Disease and Colorectal Cancer Stage of Disease and Survival                                                                                                                   | No stratification by age          |
| Colon/Colorectum | Thiessen et al.,2020 | An Examination of Lymph Node Sampling as a Predictor of Survival in Resected Node-Negative Small Bowel Adenocarcinoma: a SEER Database Analysis                                                                      | Wrong cancer sites                |

| Cancer site      | First author, date    | Title                                                                                                                                                                                        | Reason for exclusion              |
|------------------|-----------------------|----------------------------------------------------------------------------------------------------------------------------------------------------------------------------------------------|-----------------------------------|
| Colon/Colorectum | Wang et al.,2020      | Metastatic patterns and survival outcomes in patients with stage IV colon cancer: A population-based analysis                                                                                | No individual factor investigated |
| Colon/Colorectum | Wang et al.,2020      | Insurance status is related to overall survival in patients with small intestine adenocarcinoma: A population-based study                                                                    | Wrong cancer sites                |
| Colon/Colorectum | Wieszczy et al.,2020  | Colorectal Cancer Incidence and Mortality After Removal of Adenomas During Screening Colonoscopies                                                                                           | Wrong topic                       |
| Colon/Colorectum | Xiao et al.,2020      | Association of Low Muscle Mass and Low Muscle Radiodensity With Morbidity and Mortality for Colon Cancer Surgery                                                                             | No stratification by age          |
| Colon/Colorectum | Xiaochuan et al.,2020 | Clinical characteristics and prognosis of pulmonary large cell carcinoma: A population-based retrospective study using SEER data                                                             | No stratification by age          |
| Colon/Colorectum | Yang et al.,2020      | The association between the composite quality measure "textbook outcome" and long term survival in operated colon cancer                                                                     | No individual factor investigated |
| Colon/Colorectum | Yang et al.,2020      | Clinicopathological characteristics and survival in colorectal signet ring cell carcinoma: a population-based study                                                                          | No individual factor investigated |
| Colon/Colorectum | Yang et al.,2020      | Increased blood lipid level is associated with cancer-specific mortality and all-cause mortality in patients with colorectal cancer (>65 years): A population-based prospective cohort study | No survival or mortality data     |
| Colon/Colorectum | Yezefski et al.,2020  | Comparison of Treatment, Cost, and Survival in Patients With Metastatic Colorectal Cancer in Western Washington, United States, and British Columbia, Canada                                 | No stratification by age          |
| Lung             | Ayeet al.,2020        | Factors associated with overall survival in a population-based cohort of non- squamous NSCLC patients from northern New Zealand: A comparative analysis by EGFR mutation status              | No individual factor investigated |
| Lung             | Barquin et al.,2020   | Sex is a strong prognostic factor in stage IV non-small-cell lung cancer patients and should be considered in survival rate estimation                                                       | Not population-based study        |
| Lung             | Breitlinget al.,2020  | Recent Survival Trends in High-Grade Neuroendocrine Neoplasms and Lung Cancer                                                                                                                | No response from authors          |

| Cancer site | First author, date      | Title                                                                                                                                                                                                          | Reason for exclusion          |
|-------------|-------------------------|----------------------------------------------------------------------------------------------------------------------------------------------------------------------------------------------------------------|-------------------------------|
| Lung        | Chen et al.,2020        | Marital status independently predicts non-small cell lung cancer survival: a propensity-adjusted SEER database analysis                                                                                        | No stratification by age      |
| Lung        | Christensen et al.,2020 | Comorbidity and early death in Danish stage I lung cancer patients - an individualised approach                                                                                                                | No survival or mortality data |
| Lung        | Danh Pham et al.,2020   | NSCLC patient "migration" for treatment: A retrospective analysis of patient characteristics, travel patterns, and survival differences                                                                        | Not population-based study    |
| Lung        | Danila et al.,2020      | A cohort study of exposure to antihyperglycemic therapy and survival in patients with lung cancer                                                                                                              | No stratification by age      |
| Lung        | de Ruiter et al.,2020   | Centralization of lung cancer surgery in the Netherlands: differences in care and survival of patients with stage I non-small cell lung cancer between hospitals with and without in-house lung cancer surgery | No stratification by age      |
| Lung        | Hao et al.,2020         | Survival Following Segmentectomy or Lobectomy in Patients With Stage IB Non-small-cell Lung Cancer                                                                                                             | No stratification by age      |
| Lung        | He et al.,2020          | Survival, Chemotherapy Treatments, and Health Care Utilization Among Patients with Advanced Small Cell Lung Cancer: An Observational Study                                                                     | No stratification by age      |
| Lung        | Lee et al.,2020         | State-Level Disparity in Lung Cancer Survival in the United States                                                                                                                                             | No stratification by age      |
| Lung        | Lin et al.,2020         | Epidemiology and survival outcomes of lung cancer: A population-based study                                                                                                                                    | No stratification by age      |
| Lung        | Mar et al.,2020         | Changes in lung cancer survival by TNM stage in the Basque country from 2003 to 2014 according to period of diagnosis                                                                                          | Not population-based study    |
| Lung        | Marushima et al.,2020   | Survival outcomes of adjuvant chemotherapy with modified weekly nab-paclitaxel and carboplatin for completely resected nonsmall cell lung cancer: FAST-nab                                                     | Not population-based study    |
| Lung        | Sachs et al.,2020       | Household disposable income and long-term survival after pulmonary resections for lung cancer                                                                                                                  | No stratification by age      |

| Cancer site | First author, date   | Title                                                                                                                                                                                     | Reason for exclusion              |
|-------------|----------------------|-------------------------------------------------------------------------------------------------------------------------------------------------------------------------------------------|-----------------------------------|
| Lung        | Schmid et al.,2020   | Does progress achieved in the treatment of patients with metastatic non-small-cell lung cancer reach the elderly population? A cohort study from a cancer centre from Eastern Switzerland | No individual factor investigated |
| Lung        | Shah et al.,2020     | Socioeconomic disparity trends in diagnostic imaging, treatments, and survival for nonsmall cell lung cancer: 2007-2016                                                                   | No stratification by age          |
| Lung        | Shang et al.,2020    | A Novel Nomogram including AJCC Stages Could Better Predict Survival for NSCLC Patients Who Underwent Surgery: A Large Population-Based Study                                             | Wrong topic                       |
| Lung        | Shang et al.,2020    | Radiotherapy may improve survival of ES-SCLC with distant metastasis only for patients with one metastatic site: A population-based study                                                 | No stratification by age          |
| Lung        | Steindl et al.,2020  | Neurological symptom burden impacts survival prognosis in patients with newly diagnosed non-small cell lung cancer brain metastases                                                       | No stratification by age          |
| Lung        | Svaton et al.,2020   | Thyroid transcription factor 1 and p63 expression is associated with survival outcome in patients with non-small cell lung cancer treated with erlotinib                                  | No individual factor investigated |
| Lung        | Udumyan et al.,2020  | Beta-Blocker Use and Lung Cancer Mortality in a Nationwide Cohort Study of Patients with Primary Non-Small Cell Lung Cancer                                                               | No stratification by age          |
| Lung        | Williams et al.,2020 | Racial differences in treatment and survival among veterans and non-veterans with stage I NSCLC: An evaluation of veterans affairs and Seer-medicare populations                          | No stratification by age          |
| Lung        | Yoo et al.,2020      | Conditional relative survival and competing mortality in patients who underwent surgery for lung cancer: A nationwide cohort study                                                        | No individual factor investigated |
| Lung        | Youn et al.,2020     | Real-world use and survival outcomes of immune checkpoint inhibitors in older adults with non-small cell lung cancer                                                                      | No stratification by age          |

| Cancer site      | First author, date | Title                                                                                                                         | Reason for exclusion     |
|------------------|--------------------|-------------------------------------------------------------------------------------------------------------------------------|--------------------------|
|                  | Afshar et al.,2020 | Differences in cancer survival by area-level socio-economic disadvantage: A population-based study using cancer registry data | No stratification by age |
|                  | Afshar et al.,2020 | Differences in cancer survival by remoteness of residence: an analysis of data from a population-based cancer registry        | No stratification by age |
| Colon/Colorectum | Li et al.,2020     | Nomograms predicting overall survival and cancerspecific survival for synchronous colorectal liver-limited metastasis         | Wrong topic              |
